# Supplementary material
Source: Springer Nature journal article supplement (https://www.springermedizin.de/resource/supplementary/13012_2011_352_MOESM5_ESM.PDF/9629842)
Supplement: MOESM5 [file 9629842]

## Additional file 5

### Sources of definitions of interventions and policies

|               | Label                       | APA                                                                                                                                                               | OED                                                                                                                                                                                      |
|---------------|-----------------------------|-------------------------------------------------------------------------------------------------------------------------------------------------------------------|------------------------------------------------------------------------------------------------------------------------------------------------------------------------------------------|
| Interventions |                             |                                                                                                                                                                   |                                                                                                                                                                                          |
| 1.            | Education                   | The process of teaching knowledge, skills and values                                                                                                              | Systematic instruction or training                                                                                                                                                       |
| 2.            | Persuasion                  | Active attempt by one person to change another person's attitudes, beliefs or emotions associated with some issue, person, concept, or object                     | the addressing of arguments or appeals to a person in order to induce cooperation, submission, or agreement                                                                              |
| 3.            | Incentivisation             | Using an external stimulus, such as a condition or an object, that enhances or serves as a motive for behaviour                                                   | Arousing feeling, or inciting to action                                                                                                                                                  |
| 4.            | Coercion                    | The process of attempting to influence another person through the exercise of physical, psychological or social power                                             | Constraint, restraint, compulsion; the application of force to control the action of a voluntary agent                                                                                   |
| 5.            | Training                    | Systematic instruction and practice by which an individual acquires competence in a specific discipline, talent, or vocational or recreational skills of activity | systematic instruction and exercise in some art, profession, or occupation, with a view to proficiency in it                                                                             |
| 6.            | Restriction                 |                                                                                                                                                                   | Something that restricts a person or thing; a limitation on action                                                                                                                       |
| 7.            | Environmental restructuring |                                                                                                                                                                   | GOOGLE – restructuring-reorganizing or rearranging                                                                                                                                       |
| 8.            | Modelling                   | A technique in which learning occurs through observation and imitation alone                                                                                      | The action or process of eliciting a mode of behaviour by example                                                                                                                        |
| 9.            | Enablement                  | Enablement: Encouraging or allowing people to meet their own needs and achieve desired ends                                                                       | The process of rendering able, competent, or powerful/<br>source of help, information, strength, etc.                                                                                    |
| Policies      |                             |                                                                                                                                                                   |                                                                                                                                                                                          |
| 1.            | Communication/<br>marketing | Communication: The transmission of information, verbal or non-verbal                                                                                              | The transmission or exchange of information, knowledge, or ideas, by means of speech, writing, mechanical or electronic media, etc/<br>the action, business, or process of promoting and |

|    |                                |  |                                                                                                                                  |
|----|--------------------------------|--|----------------------------------------------------------------------------------------------------------------------------------|
|    |                                |  | selling a product, etc., including market research, advertising, and distribution.                                               |
| 2. | Guidelines                     |  | GOOGLE - any document that aims to streamline particular processes according to a set routine.                                   |
| 3. | Fiscal                         |  | Of or pertaining to the fisc or treasury of a state or prince; pertaining to the public revenue.                                 |
| 4. | Regulation                     |  | A rule or principle governing behaviour or practice; <i>esp.</i> such a directive established and maintained by an authority.    |
| 5. | Legislation                    |  | The action of making or giving laws; the enactment of laws, lawgiving;                                                           |
| 6. | Environmental/ social planning |  | Planning= the designing or controlling of urban or economic development                                                          |
| 7. | Service provision              |  | GOOGLE - delivery of the service directly by agency staff or authorization for the purchase of the service from another provider |
